# Supplementary material for: High-performance organic field-effect transistors based on organic single crystal microribbons fabricated by an in situ annealing method
Source: Royal Society of Chemistry journal article supplement (doi:10.1039/c8qm00385h), 2018-01-01
Supplement: c8qm00385h1.pdf [file c8qm00385h1.pdf]

## Supporting Information

### High-performance organic field-effect transistors based on organic single crystal microribbons fabricated by an in situ annealing method†

Ji Zhang, ‡<sup>a</sup> Zhaoguang Li, ‡<sup>b</sup> Weifeng Zhang,<sup>a</sup> Man Shing Wong\*<sup>b</sup> and Gui Yu\*<sup>ac</sup>

<sup>a</sup> CAS key Laboratory of Organic Solids, CAS Research/Education Center for Excellence in Molecular Sciences, Institute of Chemistry, Chinese Academy of Sciences, Beijing 100190, P. R. China

E-mail: yugui@iccas.ac.cn

<sup>b</sup> Institute of Molecular Functional Materials, Department of Chemistry, and Institute of Advanced Materials, Hong Kong Baptist University, Kowloon Tong, Hong Kong SAR, P. R. China

E-mail: mswong@hkbu.edu.hk

<sup>c</sup> School of Chemical Sciences, University of Chinese Academy of Sciences, Beijing 100049, P. R. China

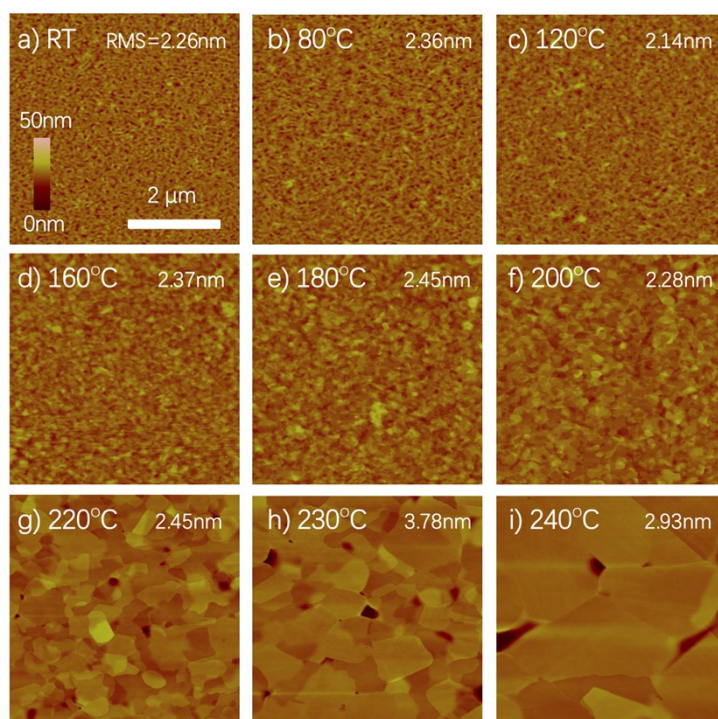

Fig. S1 AFM images of 35nm NBTBT-6 film after annealing at different temperatures (the value at top right corner in each image indicates the root mean square (RMS) roughness, respectively).

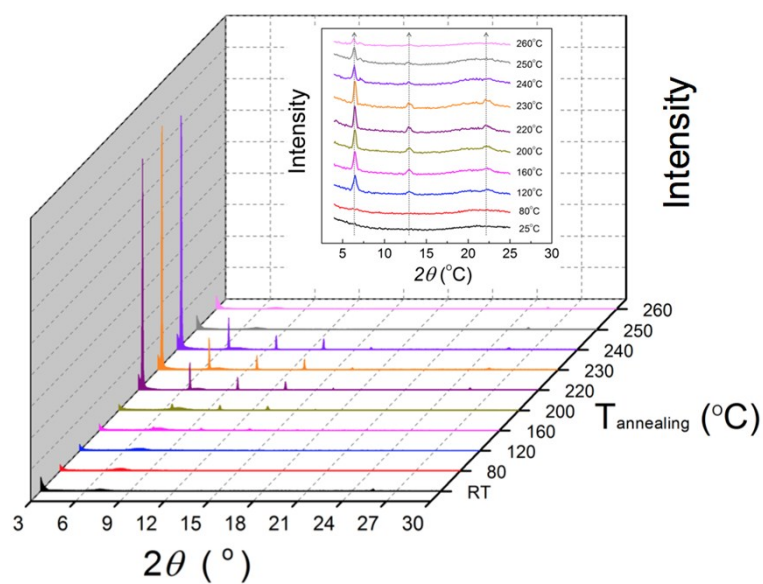

Fig. S2 Out-of-plane XRD (inset: in-plane XRD) diffractograms of 35nm NBTBT-6 film after annealing at different temperature.

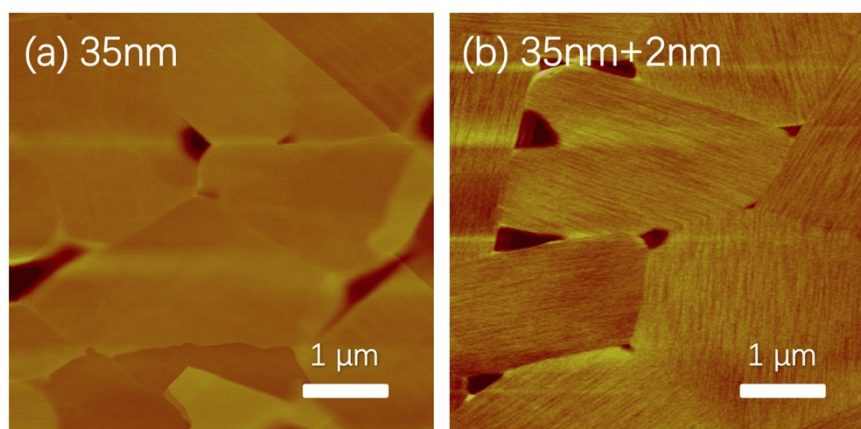

Fig. S3 AFM images of (a) 35nm NBTBT-6 film after annealing at 240°C and (b) 35nm NBTBT-6 film after annealing at 240°C, followed by vapor-deposition of 2nm NBTBT-6 thin film (1~2 layers).

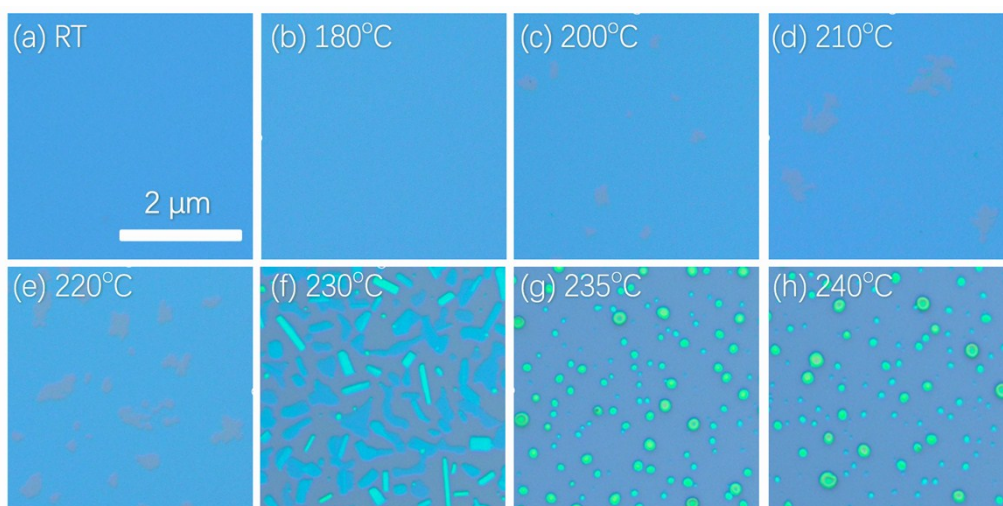

Fig. S4 Microphotographs of 2nm NBTBT-6 film after annealing at different temperatures.

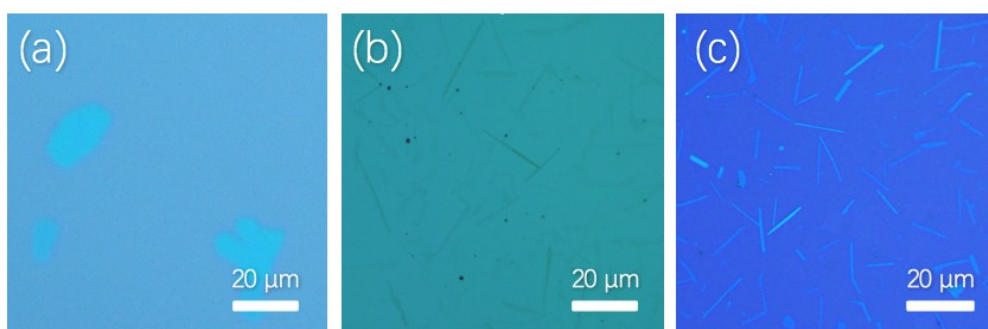

Fig. S5 Microphotographs of 2nm NBTBT-6 film after annealing at 230°C on different substrates: (a) SiO<sub>2</sub> (b) OTS-modified auto-oxidized SiO<sub>2</sub> (~1nm) (c) OTS-modified 300nm SiO<sub>2</sub>.

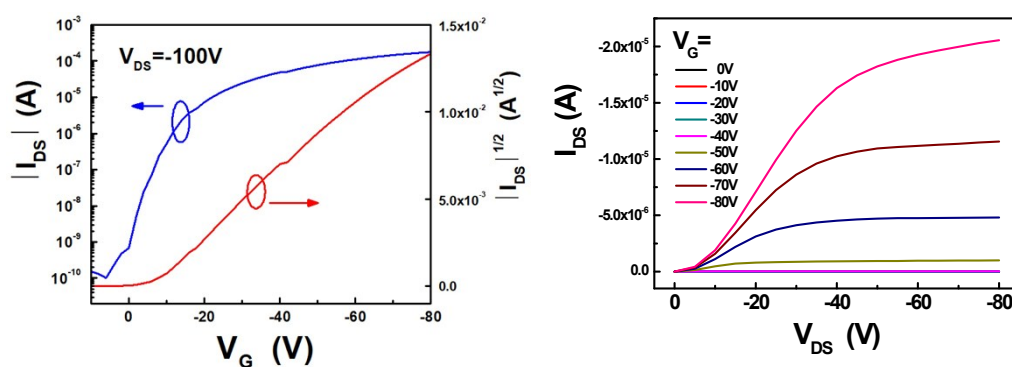

Fig. S6 The transfer and output curves of OFETs based on the vapor-grown thin films.

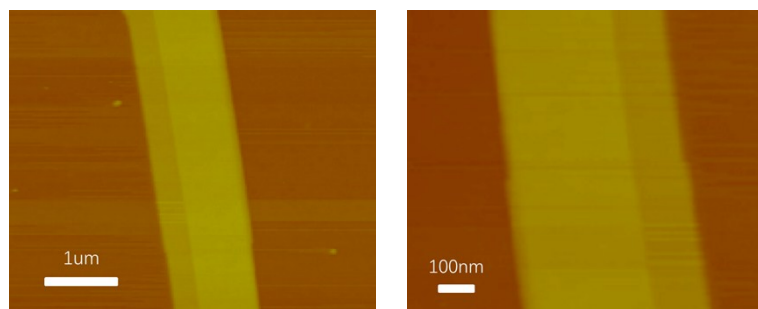

Fig. S7 Microphotographs of two NBTBT-6 microribbons.
